# Supplementary material for: Activated dendritic cells delivered in tissue compatible biomatrices induce in-situ anti-tumor CTL responses leading to tumor regression
Source: PubMed Central journal article supplement (PMC5129979; doi:10.18632/oncotarget.9529), 2016-05-20
Supplement: oncotarget-07-39894-s001.pdf [file oncotarget-07-39894-s001.pdf]

## Activated dendritic cells delivered in tissue compatible biomatrices induce *in-situ* anti-tumor CTL responses leading to tumor regression

### Supplementary Materials

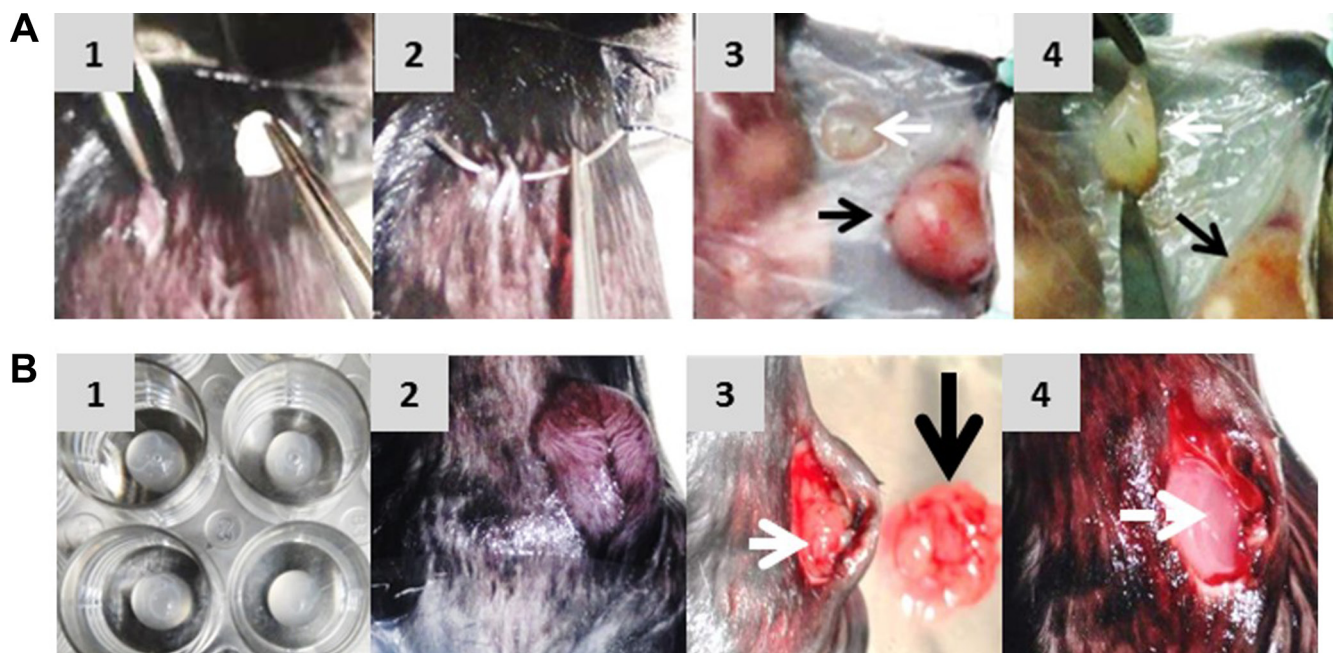

**Supplementary Figure S1: Generation of DC scaffolds for tumor treatment.** (A) Panel 1 shows the placement of DC scaffolds near the tumor site, panel 2 depicts the closing of the wound while panel 3 shows the physiological appearance of biomatrix 2–3 weeks post-implantation, and panel 4 shows the procedure of biomatrix harvesting along with host reactive tissue. White arrows show the biomatrix while black arrow shows the tumor mass. (B) Panel 1 shows the formation of flat DC scaffolds for the treatment of post-surgery secondary tumors. Panel 2 shows the tumor mass at the time of resection. Panel 3 shows the cavity created by the tumor resection (white arrow) and the removed tumor mass (black arrow). Panel 4 shows the placement of DC scaffold into the cavity for tumor treatment.

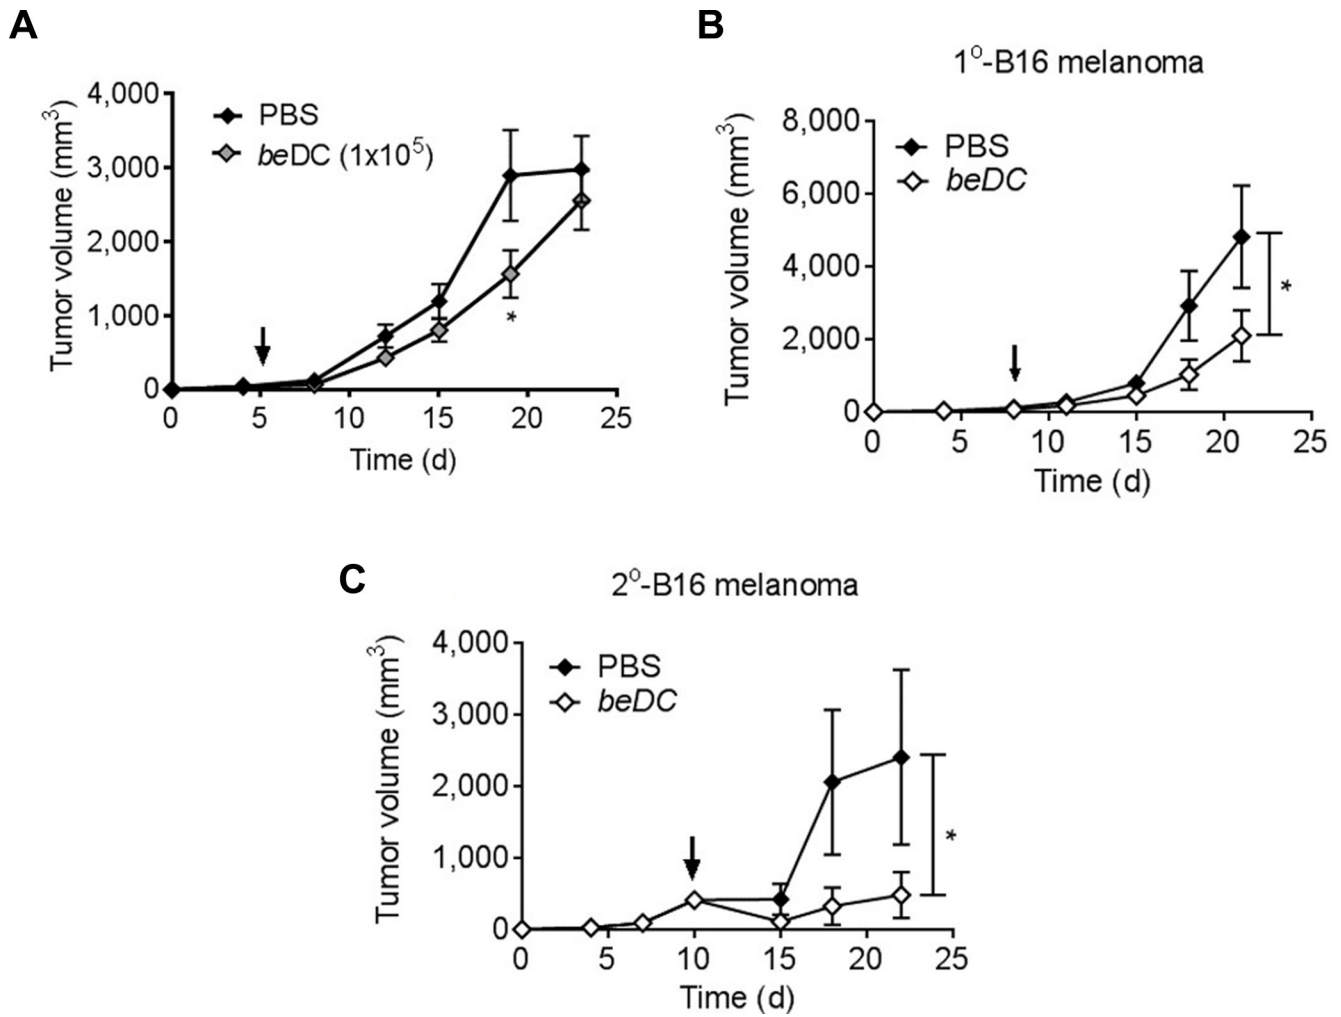

**Supplementary Figure S2:** (A) Treatment of TC1 tumors with biomatrix carrying  $1 \times 10^5$  DCs. Treatment of B16 cell induced 1<sup>o</sup> (B) or 2<sup>o</sup> (C) melanoma using DC scaffolds.  $n = 5-10$ . Black arrow in A indicates the time point of commencement of therapy while black arrow in B represents the time point of tumor resection and DC-scaffold implantation. Data is represented as + SEM. \* $p$ -value < 0.05.

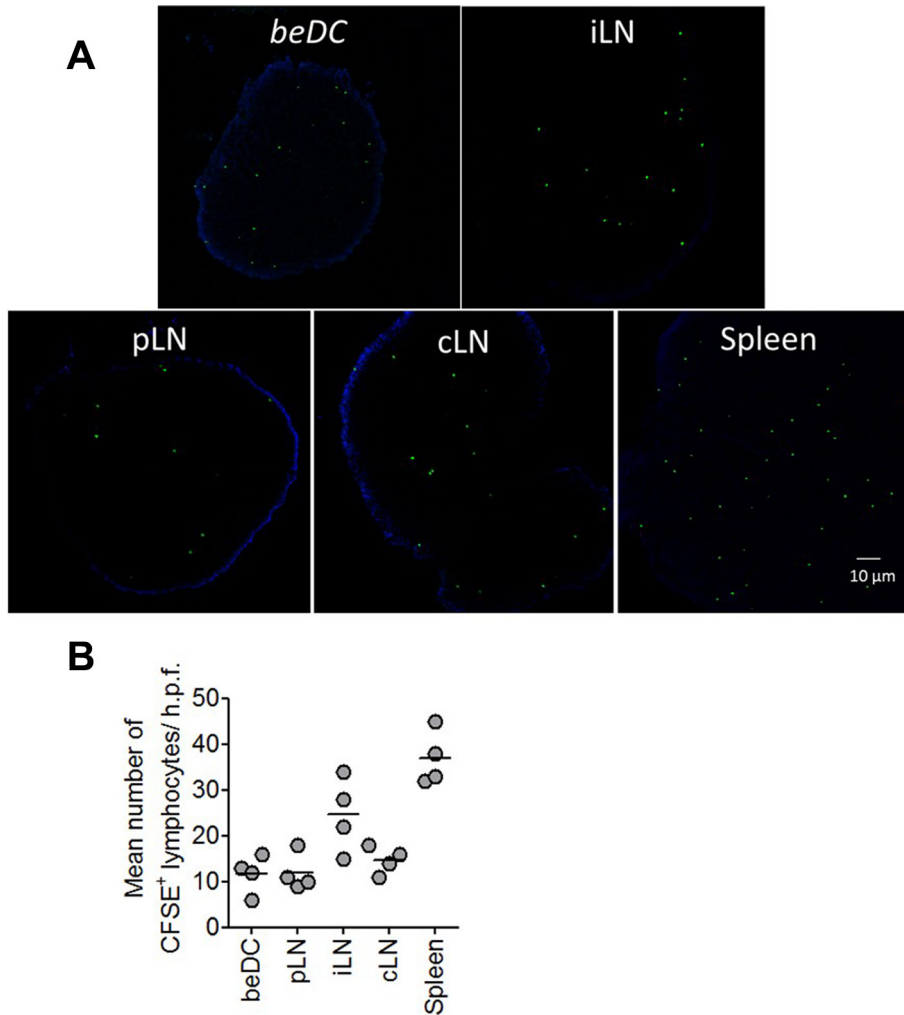

**Supplementary Figure S3: Adoptively transferred lymphocytes reach host-implanted DC scaffolds with equal propensity compared with other SLOs.** (A) Representative figures showing the relative movement of CFSE<sup>+</sup> lymphocytes into the biomatrix or SLOs 48 hours after adoptive transfer. iLN, inguinal lymph node; pLN, popliteal lymph node; cLN, cervical lymph node. (B) Quantification of infiltrating lymphocytes in high power fields.

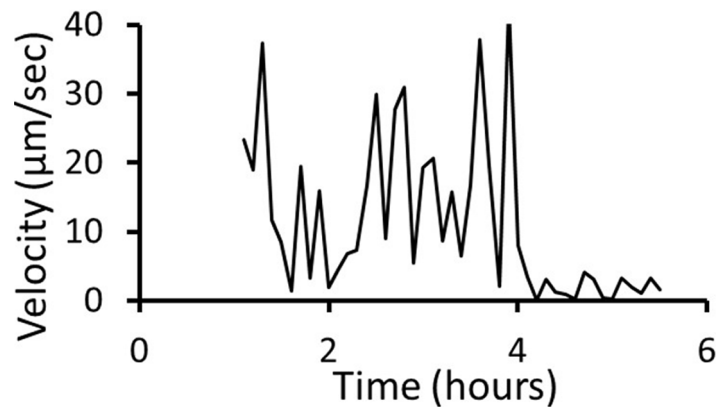

**Supplementary Figure S4: Velocity of migrating lymphocytes inside the biomatrices under *in vitro* conditions.** CFSE<sup>+</sup> lymphocytes and Q dot<sup>+</sup> DCs were put together in the scaffold and imaged using a live imaging system. The velocity was calculated using the MatLab<sup>®</sup> software.

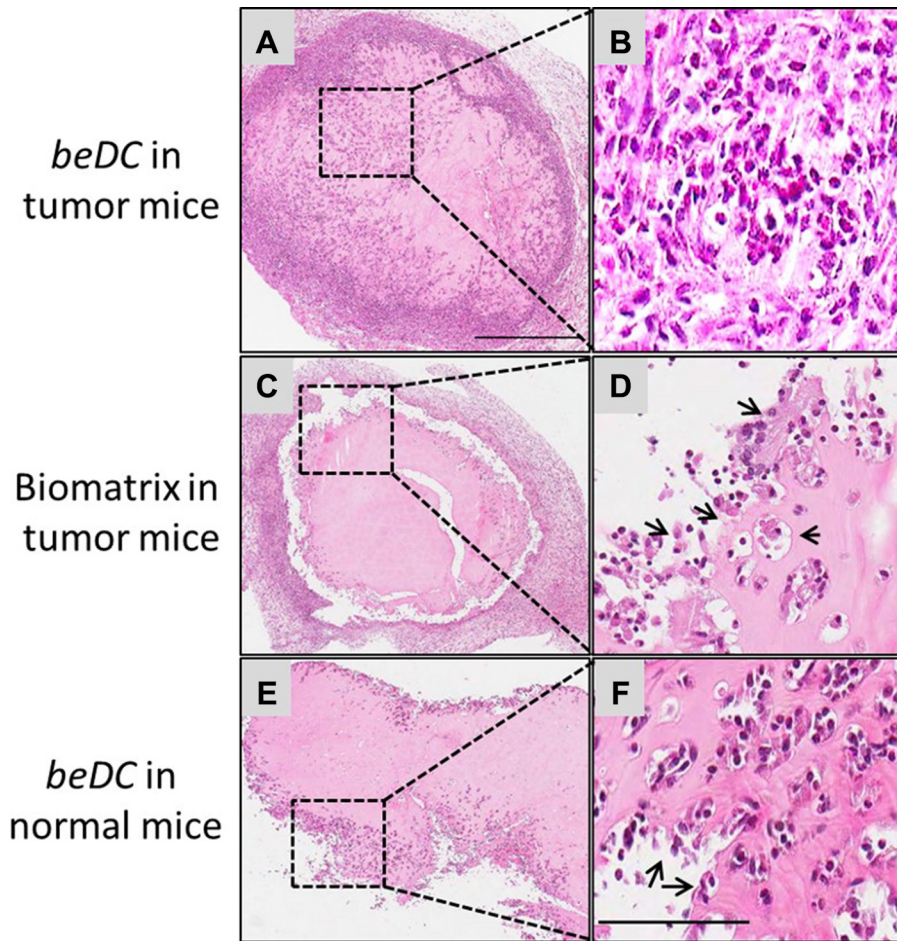

**Supplementary Figure S5: Hematoxylin and eosin staining of biomatrices harvested from various treatment groups.** (A, C, and E) are the 4x view of implants as depicted in the picture while (B, D) and (E) are the respective highlighted 40× areas. Black arrows in (D and F) show the sites of fibrin digestion by polymorphonuclear cells. Bar in A is equivalent to 1 mm while bar in (F) is equivalent to 100  $\mu\text{m}$ .

**Supplementary Movie S1: Interaction of DCs in biomatrix with infiltrating host lymphocytes.** Though the DCs in scaffolds were stationary, the dendrites projected from them were making active physical contacts with infiltrating lymphocytes. See Supplementary\_Movie\_S1

**Supplementary Movie S2: Movement of infiltrated lymphocytes inside the biomatrix.** Infiltrated host lymphocytes moved agilely and made intimate contacts with DCs for extended periods. See Supplementary\_Movie\_S2

**Supplementary Movie S3: Cell division of infiltrated lymphocytes in association with DCS inside the biomatrix.** See Supplementary\_Movie\_S3
